# Supplementary material for: The Killing of Human Neuroblastoma Cells by the Small Molecule JQ1 Occurs in a p53-Dependent Manner
Source: PubMed Central journal article supplement — Anticancer Agents Med Chem. 2020 Sep;20(13):1613–25. doi: 10.2174/1871520620666200424123834 (PMC7527568; doi:10.2174/1871520620666200424123834), 2020-09
Supplement: ACAMC-20-1613_SD1.pdf [file ACAMC-20-1613_SD1.pdf]

# SUPPLEMENTARY MATERIAL

## The Killing of Human Neuroblastoma Cells by the Small Molecule JQ1 Occurs in a p53-Dependent Manner

Joseph Mazar<sup>1,\*</sup>, Caleb Gordon<sup>1</sup>, Varun Naga<sup>1</sup> and Tamarah J. Westmoreland<sup>1</sup>

<sup>1</sup>Nemours Children's Hospital, 13535 Nemours Parkway, Orlando, FL 32827, USA

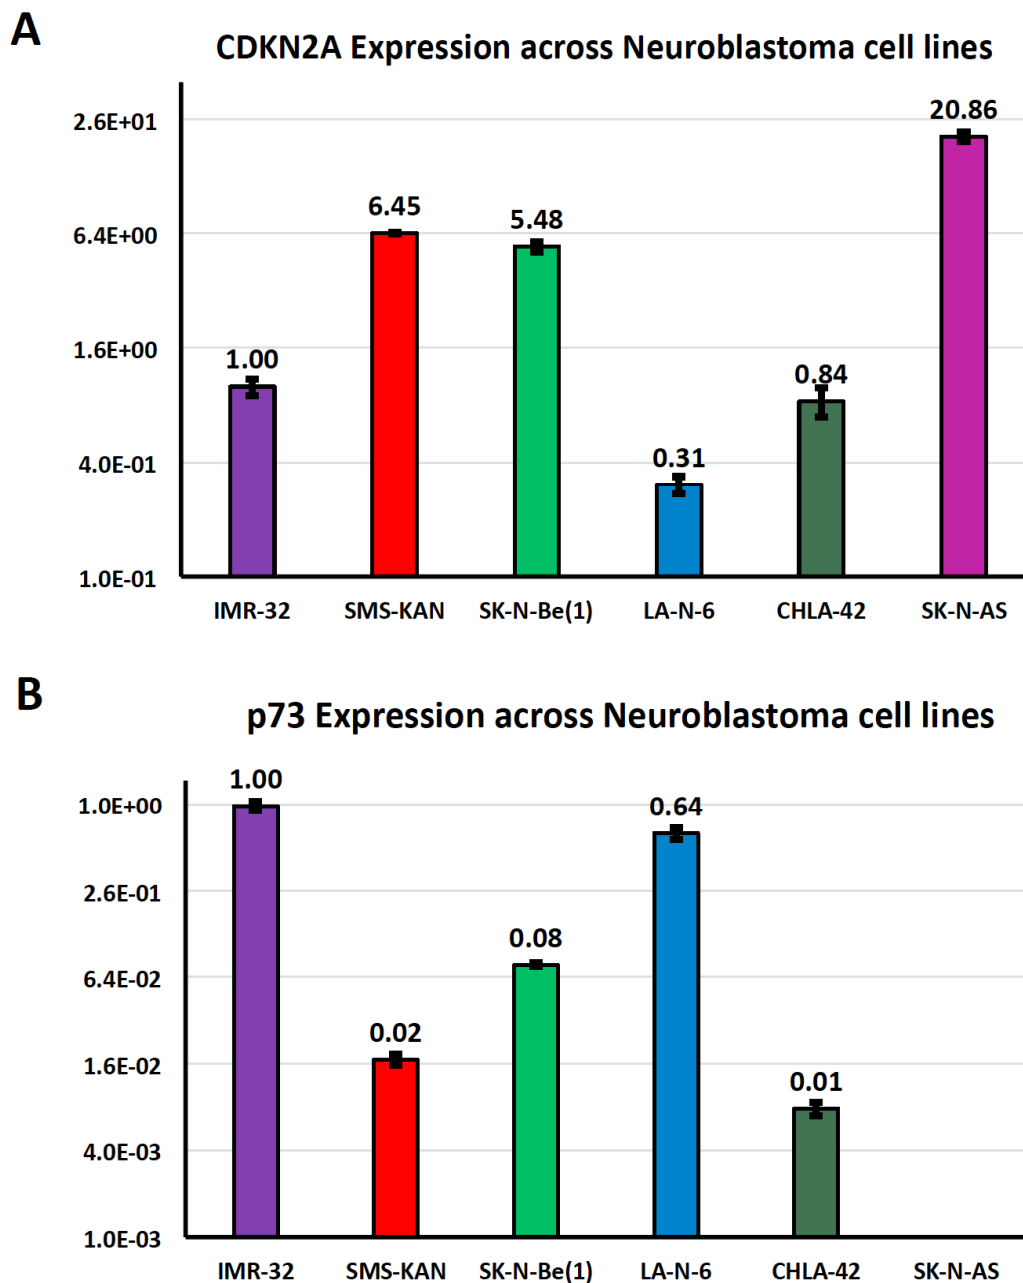

**Supplemental Fig. (1).** Confirmation of neuroblastoma cell line identity. The entire panel of neuroblastoma cell lines was screened for biological markers used in their original identification. This was performed by examination of the mRNA gene expression profiles of (A) CDKN2A and (B) p73 measured by qRT-PCR. Gene expression was normalized to GAPDH. Data shown are the composite of triplicate wells from three independent measurements. (A higher resolution / colour version of this figure is available in the electronic copy of the article).

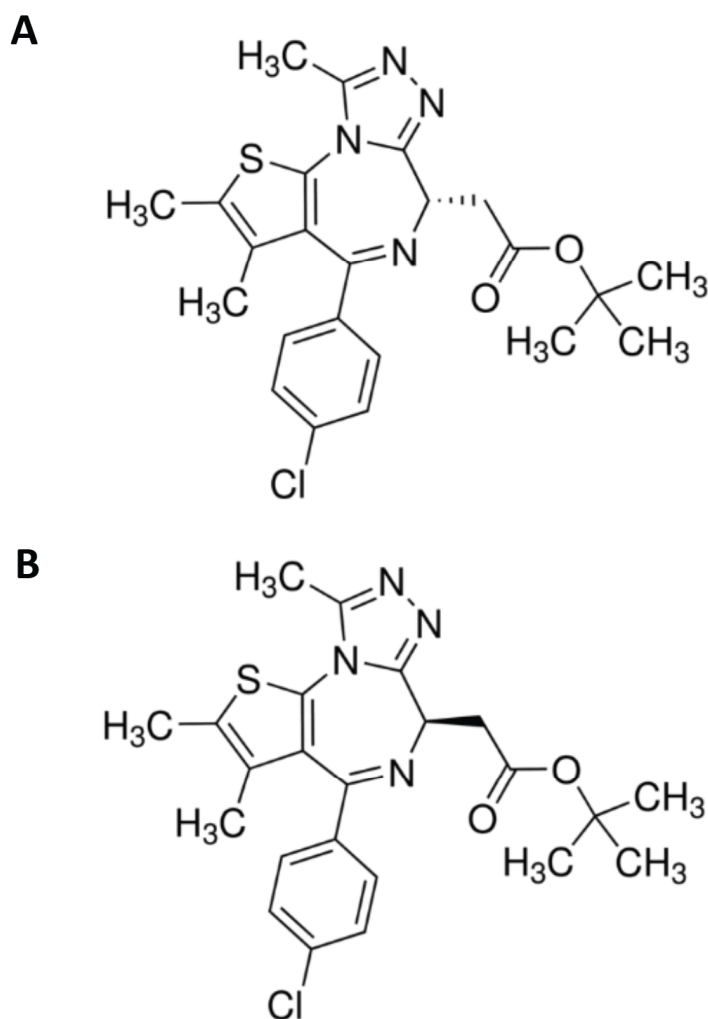

**Supplemental Fig. (2).** Molecular Structure of the Bromodomain Inhibitor JQ1. (A) (+)-JQ1 and (B) (-)-JQ1 enantiomers. (+)-JQ1, but not the (-)-JQ1 enantiomer, is a potent and highly specific inhibitor of the BET (bromodomain and extra-terminal) family of bromodomains. The (+)-JQ1 enantiomer has been shown to be a useful chemical probe for the investigation of the role of BET bromodomains in the transcriptional regulation of oncogenesis. (A higher resolution / colour version of this figure is available in the electronic copy of the article).

**Supplemental Table 1.** Background Characterization of Neuroblastoma cell lines.

| Cell Line  | Source | Accession | Patient Gender/Age | Phase of Therapy | Tissue Derivation               | Morphology            | Culture Properties  | MYCN Status   | Initial Citation              |
|------------|--------|-----------|--------------------|------------------|---------------------------------|-----------------------|---------------------|---------------|-------------------------------|
| IMR-32     | ATCC   | CVCL_0346 | Male/13 months     | Diagnosis        | Brain Metastasis/Abdominal mass | Fibroblast/neuroblast | Adherent            | Amplified     | Tumilp-wicz JJ, <i>et al.</i> |
| SK-N-AS    | ATCC   | CVCL_1700 | Female/6 years     | Post-Chemo       | Brain Metastasis/Bone Marrow    | Neuroblast            | Adherent            | Non-amplified | El-Badr OM, <i>et al.</i>     |
| LA-N-6     | COG    | CVCL_1363 | Male/6 years       | Post-Chemo       | Bone Marrow Metastasis          | Neuroblast            | Adherent            | Non-amplified | Wada RK, <i>et al.</i>        |
| CHLA-42    | COG    | CVCL_6603 | Unknown/13 months  | Diagnosis        | Bone Marrow Metastasis          | Neuroblast            | Adherent            | Non-amplified | Keshelava N, <i>et al.</i>    |
| SMS-KAN    | COG    | CVCL_7131 | Female/3 years     | Diagnosis        | Pelvis                          | Neuroblast            | Adherent/suspension | Amplified     | Reynolds CP, <i>et al.</i>    |
| SK-N-Be(1) | COG    | CVCL_9898 | Male/22 months     | Diagnosis        | Bone Marrow Metastasis          | Neuroblast            | Adherent/suspension | Amplified     | Biedler JL, <i>et al.</i>     |

Sources of the cell lines utilized within this article include ATCC (American Type Culture Collection) and COG (Children's Oncology Group).

## Supplemental Table 1.

| Cell Line   | Source | Accession | Patient Gender/Age    | Phase of Therapy | Tissue Derivation                   | Morphology                | Culture Properties  | MYCN status   | Initial Citation      |
|-------------|--------|-----------|-----------------------|------------------|-------------------------------------|---------------------------|---------------------|---------------|-----------------------|
| IMR-32      | ATCC   | CVCL_0346 | Male/13 months        | Diagnosis        | Brain Metastasis/<br>Abdominal mass | fibroblast/<br>neuroblast | Adherent            | Amplified     | Tumilowicz JJ, et al. |
| SK-N-AS     | ATCC   | CVCL_1700 | Female/6 years        | Post-Chemo       | Brain Metastasis/<br>Bone marrow    | neuroblast                | Adherent            | Non-Amplified | El-Badry OM, et al    |
| LA-N-6      | COG    | CVCL_1363 | Male/6 years          | Post-Chemo       | Bone marrow Metastasis              | neuroblast                | Adherent            | Non-Amplified | Wada RK, et al.       |
| CHLA-42     | COG    | CVCL_6603 | Unknown/<br>13 months | Diagnosis        | Bone marrow Metastasis              | neuroblast                | Adherent            | Non-Amplified | Keshelava N, et al.   |
| SMS-KAN     | COG    | CVCL_7131 | Female/3 years        | Diagnosis        | Pelvis                              | neuroblast                | Adherent/Suspension | Amplified     | Reynolds CP, et al.   |
| SK-N-Bel(1) | COG    | CVCL_9898 | Male/22 months        | Diagnosis        | Bone marrow Metastasis              | neuroblast                | Adherent/Suspension | Amplified     | Biedler JL, et al.    |
